# Supplementary material for: Rethinking genomics of facioscapulohumeral muscular dystrophy in the telomere-to-telomere era: pitfalls in the hidden landscape of D4Z4 repeats
Source: Eur J Hum Genet. 2026 Jan 14;34(3):357–67. doi: 10.1038/s41431-025-02000-x (PMC12963445; doi:10.1038/s41431-025-02000-x)
Supplement: Supplementary file 1 — Supplemental Table 1 [file 41431_2025_2000_MOESM1_ESM.xlsx]

## Sheet: DUX4_expression 
Supplemental Table 1. Primers used in PCR and RT-PCR experiments.
RNA Expression					GRCh38/hg38 in silco PCR (alt & fix excluded): number of amplicons x chromosome		Total number of predicted amplicons	T2T CHM13v2.0/hs1 in silco PCR: number of amplicons x chromosome		Total number of predicted amplicons
Primer set	Primer name	Primer sequence (5’-3’)	Target region within D4Z4	Amplicon size on gDNA	Chromosome	Number		Chromosome	Number		Notes	Reference	gDNA CHO Monohybrids
1	DUX4Ex1-qPCR-F	GACACCCTCGGACAGCA	DUX4 Exon1	105 bp	chr4	4	4	chr4	33	33	Intended to detect D4Z4 transcripts for each repat of chromosme 4	PMID: 40320530	chr4*	* these primers sets have already been tested in PMID: 40320530
	DUX4Ex1-qPCR-R	TCAAAGCAGGCTCGCAG	DUX4 Exon1										chr10*
2	DUX4FLqPCR-F1	CCCAGGTACCAGCAG	DUX4 Exon2	526 bp	chr4	1	3	chr4	1	2		PMID: 33436523	chr13*
													chr14*
	DUX4FL qPCR-R1	TCCAGGAGATGTAACTCTAATCCA	DUX4 Exon3		chr10	2		chr10	1				chr18*
3	DUX4FLqPCR-F2	ACCGCGGAGAACTGCCATTC	DUX4 Exon2	521 bp	chr10	2	3	chr4	1	9		PMID: 27467759	chr10*
								chr10	1				chr13*
								chr13	1				chr10*
								chr14	1				chr13*
	DUX4FL qPCR-R2	GACATTCAGCCAGAATTTCAC	DUX4 Exon3		chr18	1		chr15	1				chr14*
								chr21	1				chr15*
								chr18	1				chr21*
								chr1	2				chr22*
4	DUX4FL qPCR-F3	CTTCCGTGAAATTCTGGCTGAATG	DUX4 Exon3	135 bp	chr4:190175713+190175845	1	1	chr4:193543518+193543650	1	1		PMID: 37021550	chr1*
													chr4*
													chr10*
													chr13*
	DUX4FL qPCR-R3	TTTTTTTTTTTTTTTTTCTATAGGATCCACAGG	DUX4 Exon3 polyA										chr14*
													chr15*
													chr21*
													chr22*
													chrY*
5	DUX4FOR	GGACTCGAGACTCCGTTCAA	not present		chr4:190093257+190093366		1	off target p16.3 chr4:1-4469440		1 off target		PMID: 22541069 and PMID: 37021550	n.d.
	DUX4REV	CCATCCTGAGTTCATTTTTGTG	not present
6	DUXFw	GCGCAACCTCTCCTAGAAAC	DUX4 Exon1	104 bp	chr4	10	24	chr4	33	66		PMID: 32731450	chr 4
													chr10
													chr13
	DUX4Rv	AGCAGAGCCCGGTATTCTTC	DUX4 Exon1			14		chr10					chr14
					chr10				33				chr15
													chr21
													chr22
7	DUX4FOR:	CGGAGAACTGCCATTCTTTC	DUX4 Exon 2 repeat 1	1223 bp	chr4	8	20	chr4	33	84		PMID: 29533181
								chr10	33				chr13
								chr1	4				chr14
								chr13	1				chr15
	DUX4LREV:	GTAGAAGACCAGAGCGAGACCCCAGAGAG	DUX4 Promoter repeat 2		chr10	12		chr14	2				chr21
								chr15	3				chr22
								chr21	3
								chr22	5
8	DUX4 For	GCTCTGCTGGAGGAGCTTTAGGA	DUX4 Exon1	258 bp	chr4	8	23	chr4	23	111	Considering the first 14 nt of Exon 2 in reverse primer	PMID: 24636994
								chr10	33				chr4
								chr1	5				chr10
					chr10	13		chr13	2				chr13
								chr14	20				chr14
	DUX4 Rev	GCAGGTCTGCWGGTACCTGG	DUX4 Exon2/Exon3		chr18	1		chr15	7				chr15
								chr18	1				chr18
								chr21	7				chr21
					chrY	1		chr22	12				chr22
								chrY	1
9	DBEFOR	AGGCCTCGACGCCCTGGGTC	DUX4 promoter-DBE region	179 bp	chr4	8	19	chr4	33	64		PMID: 22541069 and PMID: 37021550	chr4*	* these primers sets have already been tested in PMID: 40320530
	DBEREV	TCAGCCGGACTGTGCACTGCGGC	DUX4 promoter-DBE region		chr10	11		chr10	31				chr10*
10	DBE-TReg1-F	TGGGCATTTTCTCATTAGCC	DBE-T 5'	493 bp	chr4:190064720+190065212		1	chr4:193432849+193433341	1	1		PMID: 22541069 and PMID: 37021550	chr1
													chr4
													chr10
													chr15
	DBE-TReg1-R	CCATCTCCCCTCACACACTT	DBE-T NDE										chr21
													chr22
													chrY
11	DBE-TReg2-F	AGGCAAAATCCTCCCAGAATC	DBE-T NDE	860 bp	chr4:193433179+193434038	1	1	chr4:193433179+193434038	1	1		PMID: 22541069 and PMID: 37021550	chr4
	DBE-TReg2-R	CCTAAAGCTCCTCCAGCAGA	DUX4 Exon1 (1st partial repeat)
12	DBE-TReg3_F	CGCAACCTCTCCTAGAAACG	DUX4 Exon1 (1st partial repeat)	442 bp	chr4	9	27	chr4	33	66		PMID: 22541069 and PMID: 37021550	chr22
	DBE-TReg3-R	CTGGTGGAGAGGCAGGAGAG	DUX4 promoter		chr10	18		chr10	33
13	DBE-TReg4-F	CGGAGAACTGCCATTCTTTC	DUX4 promoter	695 bp	chr4	9	21	chr4	33	64		PMID: 22541069 and PMID: 37021550	chr4
													chr10
													chr13
	DBE-TReg4-R	GGACGCTGACCGTTTTCC	DUX4 promoter		chr10	12		chr10	31				chr14
													chr15
14	DBE-TReg5-F	GAGAGAGGAACGGGAGACCT	DUX4 promoter	540 bp	chr4	8	19	chr4	33	65		PMID: 22541069 and PMID: 37021550	chr14
								chr10	31				chr21
	DBE-TReg5-R	GGAGAGACGTGAGCAACAGG	DUX4 promoter		chr10	11		chr14	1				chr22
15	DBE-TReg6-F	GGTTCACAGACCGCACATC	DUX4 promoter	301 bp	chr4	4	15	chr4	33	66		PMID: 22541069 and PMID: 37021550	chr4 chr10 chr13 chr15
	DBE-TReg6-R	GTGGGGAGTCTGCAGTGTG	DUX4 promoter		chr10	11		chr10	33				chr21
													chr22
16	DBE-TReg7-F	GGAGGCGTGATTTTGGTTT	DUX4 promoter	432 bp	chr4	8	19			69		PMID: 22541069 and PMID: 37021550	chr4
								chr4	33				chr10
								chr10	33				chr13
								chr21	1				chr14
	DBE-TReg7-R	GAGGGGAGTGTGGAACTGAA	DUX4 promoter		chr10	11		chr22	1				chr15
								chr1	1				chr21
													chr22
17	DBE-TReg8-F	ACGTGGAAATGAACGAGAGC	DUX4 promoter	574 bp	chr4	8	19	chr4	33	64		PMID: 22541069 and PMID: 37021550	chr1
													chr4
													chr10
													chr13
	DBE-TReg8-R	TCAGCCGGACTGTGCACTGCGGC	DUX4 promoter-DBE region		chr10	11		chr10	31				chr14
													chr15
													chr21
													chr22
													chrY
